# Supplementary material for: Meta-Analysis of a New Georeferenced Database on Polycyclic Aromatic Hydrocarbons in Western and Central Mediterranean Seafood
Source: MDPI journal article supplement (doi:10.3390/app12062776), 2022-03-08
Supplement: s1 [file s1]

Table S1. Columns of the database [modified from [1]. Yellow rows were added in this study].

| Name of the column              | Description of the parameter                                                                                         |
|---------------------------------|----------------------------------------------------------------------------------------------------------------------|
| <b>id</b>                       | Unique identifier                                                                                                    |
| <b>country</b>                  | The jurisdictional water where sampling took place                                                                   |
| <b>location</b>                 | The specific location of sampling                                                                                    |
| <b>fao_division</b>             | Code of FAO fishing division                                                                                         |
| <b>sea</b>                      | Sea where sampling took place                                                                                        |
| <b>lat</b>                      | Latitude (decimal degrees) of the site                                                                               |
| <b>lon</b>                      | Longitude (decimal degrees) of the site                                                                              |
| <b>geog_prec</b>                | The accuracy of geographical coordinates ( <i>see Table: geog_prec</i> )                                             |
| <b>class</b>                    | Taxonomic class                                                                                                      |
| <b>order</b>                    | Taxonomic order                                                                                                      |
| <b>family</b>                   | Taxonomic family                                                                                                     |
| <b>spec_name_s</b>              | Scientific name of the species                                                                                       |
| <b>spec_name_c</b>              | Common name of the species                                                                                           |
| <b>spec_code</b>                | Code of the species: three first letters of genus and species                                                        |
| <b>mar_habit</b>                | Habitat of the species                                                                                               |
| <b>troph_lev</b>                | Decimal number of position that an individual occupies compared to the basic trophic level represented by autotrophs |
| <b>troph_lev_r</b>              | Source of trophic level ( <i>see Table: troph_lev_r</i> )                                                            |
| <b>depth_m</b>                  | Depth of sampling in meters                                                                                          |
| <b>length_cm</b>                | Length of sample in centimetres                                                                                      |
| <b>weight_g</b>                 | Weight of sample in grammes                                                                                          |
| <b>age_y</b>                    | Age of the organism in years                                                                                         |
| <b>sex</b>                      | Sex of the organism                                                                                                  |
| <b>tissue_code</b>              | Code of the studied tissue ( <i>see Table: tissue_code</i> )                                                         |
| <b>pah</b>                      | PAH analysed ( <i>see Table: PAH</i> )                                                                               |
| <b>pah_molecular_weight</b>     | Molecular weight of analysed PAHs ( <i>see Table: Molecular weight</i> )                                             |
| <b>pah_origin</b>               | Origin of analysed PAHs                                                                                              |
| <b>DW_FW_WW</b>                 | Water content of the sample as reference to PAHs ( <i>see Table: DW_FW_WW</i> ).                                     |
| <b>LOQ_mg_kg</b>                | Limit of quantification in mg/kg                                                                                     |
| <b>LOD_mg_kg</b>                | Limit of detection in mg/kg                                                                                          |
| <b>mea_mg_kg_orig</b>           | Mean PAH concentration in mg/kg                                                                                      |
| <b>mea_mg_kg_derived</b>        | Mean PAH concentration in mg/kg converted in WW (wet weight)                                                         |
| <b>min_mg_kg</b>                | Minimum PAH concentration in mg/kg                                                                                   |
| <b>max_mg_kg</b>                | Maximum PAH concentration in mg/kg                                                                                   |
| <b>sample_size</b>              | Number of samples                                                                                                    |
| <b>period</b>                   | When samples were collected                                                                                          |
| <b>samp_date</b>                | Date of sampling                                                                                                     |
| <b>season</b>                   | Season in which sampling took place (seasons were defined based on water temperature).                               |
| <b>wild_farmed_transplanted</b> | State of the organism                                                                                                |
| <b>ref_source</b>               | Reference to the original document reporting the data                                                                |
| <b>yr_ref</b>                   | Publication year                                                                                                     |
| <b>yr_samp</b>                  | Year in which sampling was carried out                                                                               |
| <b>ref_num</b>                  | Progressive number of the reference                                                                                  |
| <b>THQ_mean_orig</b>            | Target hazard quotient (calculated from mea_mg_kg_orig) ( <i>see Table: indices and formulas</i> )                   |
| <b>THQ_mean_derived</b>         | Target hazard quotient (calculated from mea_mg_kg_derived) ( <i>see Table: indices and formulas</i> )                |
| <b>THQ_min</b>                  | Target hazard quotient (calculated from min_mg_kg) ( <i>see Table: indices and formulas</i> )                        |

|                          |                                                                                                                                                                               |
|--------------------------|-------------------------------------------------------------------------------------------------------------------------------------------------------------------------------|
| <b>THQ_max</b>           | Target hazard quotient (calculated from max_mg_kg) ( <i>see Table: indices and formulas</i> )                                                                                 |
| <b>ELCR</b>              | Cancer risk ( <i>see Table: indices and formulas</i> )                                                                                                                        |
| <b>species_IR_kg/day</b> | Food ingestion rate in kg/day (FAOSTAT, 2018)                                                                                                                                 |
| <b>RFD_mg/kg/day</b>     | Oral reference dose for PAH ( <a href="https://cfpub.epa.gov/ncea/iris/search/index.cfm">https://cfpub.epa.gov/ncea/iris/search/index.cfm</a> - accessed on 01 December 2021) |
| <b>CSF_mg/kg-day</b>     | Cancer slope factor for PAH ( <a href="https://oehha.ca.gov/chemicals">https://oehha.ca.gov/chemicals</a> - accessed on 01 December 2021)                                     |
| <b>remarks</b>           | Optional remarks on the record                                                                                                                                                |
| <b>EF_day/yr</b>         | Frequency of exposure to PAH in day per year                                                                                                                                  |
| <b>ED_yr</b>             | Duration of exposure to PAH in year (average life expectancy in Italy – ISTAT, 2019)                                                                                          |
| <b>BW_kg</b>             | Body weight in kg (average body weight in Italy – ANSA, 2013)                                                                                                                 |
| <b>AT</b>                | Average exposure time for non-carcinogens                                                                                                                                     |

Table S2. Geographic precision code used in the database [from [1]].

| Location precision | Provided location info      | Description                                                                                                                                                                                                             |
|--------------------|-----------------------------|-------------------------------------------------------------------------------------------------------------------------------------------------------------------------------------------------------------------------|
| <b>1</b>           | Specific latitude/longitude | Exact latitude/longitude provided in literature.                                                                                                                                                                        |
| <b>2</b>           | Specific description        | Able to approximate latitude/longitude with specific site location information; match geographic features on provided map with Google Earth, or name of small area is given (e.g. city, small bay, cove) in literature. |
| <b>3</b>           | Less Specific: <250 km      | No latitude/longitude, or specific site location information as described above. Provided with a water body title (i.e. sound, bay, gulf, etc.) or description of region with a distance across of <250 km.             |
| <b>4A</b>          | Specific: <500 km           | Latitude/longitude or specific site location information given for multiple sites, with single mean PAH value reported across all sites. Furthest sampling locations are <500 km apart.                                 |
| <b>4B</b>          | Vague: <500 km              | No latitude/longitude, or specific site location information. Estimated sampling area based on literature description is <500 km across.                                                                                |
| <b>5A</b>          | Specific: <1,000 km         | Latitude/longitude or specific site location information given for multiple sites, with single mean PAH value reported across all sites. Furthest sampling locations are 500–1,000 km apart.                            |
| <b>5B</b>          | Vague: <1,000 km            | No latitude/longitude, or specific site location information. Estimated sampling area based on literature description is 500–1,000 km across.                                                                           |
| <b>6A</b>          | Specific: >1,000 km         | Latitude/longitude or specific site location information given for multiple sites, with single mean PAH value reported across all sites. Furthest sampling locations are >1,000 km apart.                               |

Table S3. Sources of the trophic levels of the organisms included in the database.

| Code       | Source of trophic level                                                                          |
|------------|--------------------------------------------------------------------------------------------------|
| <b>FB</b>  | FishBase ( <a href="https://www.fishbase.se/search.php">https://www.fishbase.se/search.php</a> ) |
| <b>SLB</b> | SeaLifeBase ( <a href="https://sealifebase.ca/">https://sealifebase.ca/</a> )                    |

Table S4. Tissues codes used in the database (modified from [1]).

| Code       | Tissue                                           |
|------------|--------------------------------------------------|
| <b>APP</b> | Appendages (Crustaceans)                         |
| <b>FI</b>  | Fillet (fish)                                    |
| <b>FL</b>  | Flesh                                            |
| <b>GI</b>  | Gills                                            |
| <b>GO</b>  | Gonads (sex indeterminate)                       |
| <b>LI</b>  | Liver                                            |
| <b>MU</b>  | Muscle (mixed, undetermined)                     |
| <b>SK</b>  | Skin                                             |
| <b>SO</b>  | Soft part (whole body without carapace or shell) |
| <b>WH</b>  | Whole body                                       |

Table S5. PAHs included in the database.

| Code           | PAH species                                                    |
|----------------|----------------------------------------------------------------|
| <b>1MeNap</b>  | 1-MeNaphthalene                                                |
| <b>2MeNap</b>  | 2-MeNaphthalene                                                |
| <b>5MC</b>     | 5-Methylchrysene                                               |
| <b>Ace</b>     | Acenaphthene                                                   |
| <b>Acy</b>     | Acenaphthylene                                                 |
| <b>Ant</b>     | Anthracene                                                     |
| <b>BaA</b>     | Benzo(a)anthracene                                             |
| <b>BaP</b>     | Benzo(a)pyrene                                                 |
| <b>BF</b>      | Benzo(b)fluoranthene+Benzo(j)fluoranthene+Benzo(k)fluoranthene |
| <b>BaF</b>     | Benzo(a)fluoranthene                                           |
| <b>BbF</b>     | Benzo(b)fluoranthene                                           |
| <b>BeP</b>     | Benzo(e)pyrene                                                 |
| <b>BghiFlu</b> | Benzo[ghi]fluoranthene                                         |
| <b>BghiP</b>   | Benzo(g,h,i)perylene                                           |
| <b>BkF</b>     | Benzo(k)fluoranthene                                           |
| <b>C1Nap</b>   | C1-Naphthalene                                                 |
| <b>C2Nap</b>   | C2-Naphthalene                                                 |
| <b>C3Nap</b>   | C3-Naphthalene                                                 |
| <b>C1Phe</b>   | C1-Phenanthrene                                                |
| <b>C2Phe</b>   | C2-Phenanthrene                                                |
| <b>CcdPyr</b>  | Cyclopenta(cd)pyrene                                           |
| <b>Chr</b>     | Chrysene                                                       |
| <b>Da</b>      | Dibenzo(a,h)anthracene+Dibenzo(a,c)anthracene                  |
| <b>DaeP</b>    | Dibenzo(a,e)pyrene                                             |
| <b>DahA</b>    | Dibenzo(a,h)anthracene                                         |
| <b>DahP</b>    | Dibenzo(a,h)pyrene                                             |
| <b>DaiP</b>    | Dibenzo(a,i)pyrene                                             |
| <b>DalP</b>    | Dibenzo(a,l)pyrene                                             |
| <b>Fl</b>      | Fluorene                                                       |
| <b>Flu</b>     | Fluoranthene                                                   |
| <b>InP</b>     | Indeno(1,2,3-cd)pyrene                                         |
| <b>Nap</b>     | Naphthalene                                                    |
| <b>Per</b>     | Perylene                                                       |
| <b>Phe</b>     | Phenanthrene                                                   |
| <b>Pyr</b>     | Pyrene                                                         |
| <b>Try</b>     | Triphenylene                                                   |

|                 |                                                                   |
|-----------------|-------------------------------------------------------------------|
| <b>HMW-PAHs</b> | BaA+BaP+BbF+BghiP+BkF+Chr+DahA+InP                                |
| <b>LMW-PAHs</b> | Ace+Acy+Ant+Fl+Nap+Phe                                            |
| <b>MMW-PAHs</b> | Flu+Pyr                                                           |
| <b>PAH16</b>    | Ace+Acy+Ant+Fl+Nap+Phe+Flu+Pyr+BaA+BaP+BbF+BghiP+BkF+Chr+DahA+InP |
| <b>PAH4</b>     | BaA+BaP+BbF+Chr                                                   |
| <b>PAH5</b>     | BaA+5MC+BbF+BkF+DahA+InP                                          |
| <b>PAH6</b>     | Chr+DaIP+DaeP+DaiP+DahP                                           |

Table S6. PAHs molecular weight abbreviations used in the database.

| Code       | Molecular weight                                           |
|------------|------------------------------------------------------------|
| <b>LMW</b> | Low molecular weight (Ace+Acy+Ant+Fl+Nap+Phe)              |
| <b>MMW</b> | Medium molecular weight (Flu+Pyr)                          |
| <b>HMW</b> | High molecular weight (BaA+BaP+BbF+BghiP+BkF+Chr+DahA+InP) |

Table S7. water content abbreviations used in the database.

| Code      | Water content |
|-----------|---------------|
| <b>DW</b> | Dry weight    |
| <b>FW</b> | Fresh weight  |
| <b>WW</b> | Wet weight    |

Table S8. Indices and formulas included in the database.

| Parameter   | Description                                                                                                                                                                                                                                            | Formula                                                                                                                                                                                                                                                                                                                                                                                                                                                                     |
|-------------|--------------------------------------------------------------------------------------------------------------------------------------------------------------------------------------------------------------------------------------------------------|-----------------------------------------------------------------------------------------------------------------------------------------------------------------------------------------------------------------------------------------------------------------------------------------------------------------------------------------------------------------------------------------------------------------------------------------------------------------------------|
| <b>THQ</b>  | Target hazard quotient; it indicates the ratio between exposure and the reference dose. When THQ risk is above 1, it means that THQ is higher than the reference dose, and systemic effects may occur [2].                                             | $THQ = EF \text{ (day/yr)} \times ED \text{ (yr)} \times IR \text{ (kg/day)} \times C \text{ (mg/kg)} \div RFD \text{ (mg kg}^{-1} \text{ day)} \times BW \text{ (kg)} \times AT$ <p>Where EF is frequency of exposure to PAH in day per year, ED the duration of exposure to PAH in year, IR the food ingestion rate in kg/day, C the PAH concentration, RFD the oral reference dose for PAH, BW the body weight, and AT the average exposure time for non-carcinogens</p> |
| <b>ELCR</b> | Excess Lifetime Cancer risk; if ELCR is above the acceptable lifetime risk (ALR) of $10^{-5}$ , threshold value considered by the US-EPA [3], it indicates a probability greater than 1 chance over 100,000 of an individual of developing cancer [2]. | $ELCR = EF \text{ (day/yr)} \times ED \text{ (yr)} \times IR \text{ (kg/day)} \times CSF \text{ (mg kg}^{-1} \text{ day)} \div BW \text{ (kg)} \times AT$ <p>Where EF is frequency of exposure to PAH in day per year, ED the duration of exposure to PAH in year, IR the food ingestion rate in kg/day, CSF the cancer slope factor for PAH, BW the body weight, and AT the average exposure time for non-carcinogens</p>                                                  |

Table S9. Pairwise comparisons between the three PAHs classes in Mediterranean mussel, using Wilcoxon rank sum test. P-value adjustment method: Benjamini-Hochberg.

|     | HMW      | LMW      |
|-----|----------|----------|
| LMW | 0.024    | -        |
| MMW | 2.00E-16 | 2.00E-16 |

Table S10. Pairwise comparisons between the three PAHs classes in Manila clam, using Wilcoxon rank sum test. P-value adjustment method: Benjamini-Hochberg.

|     | HMW      | LMW      |
|-----|----------|----------|
| LMW | 0.0058   | -        |
| MMW | 2.00E-16 | 2.00E-16 |

Table S11. Pairwise comparisons between the three PAHs classes in common sole, using Wilcoxon rank sum test. P-value adjustment method: Benjamini-Hochberg.

|     | HMW      | LMW      |
|-----|----------|----------|
| LMW | 4.4E-12  | -        |
| MMW | 3.90E-15 | 7.40E-06 |

Table S12. Pairwise comparisons between the three PAHs classes in red mullet, using Wilcoxon rank sum test. P-value adjustment method: Benjamini-Hochberg.

|     | HMW       | LMW      |
|-----|-----------|----------|
| LMW | 0.0000087 | -        |
| MMW | 2.20E-05  | 8.70E-01 |

Table S13. Comparison between mean concentrations measured in cold and warm months in Mediterranean mussel, using Wilcoxon rank sum test with continuity correction.

|     | W       | p-value  |
|-----|---------|----------|
| LMW | 466928  | 0.6573   |
| MMW | 116590  | 0.02062  |
| HMW | 1966608 | 0.001802 |

Table S14. Comparison between mean concentrations measured in cold and warm months in Mediterranean mussel, controlling for the effect of sampling depth and sampling year with ANCOVA.

|     | h       | p-value |
|-----|---------|---------|
| LMW | 61.9416 | 0.1644  |
| MMW | 61.7926 | 0.0187  |
| HMW | 61.1097 | 0.0288  |

Table S15. Comparison between mean concentrations measured in cold and warm months in Manila clam, using Wilcoxon rank sum test with continuity correction.

|     | W     | p-value   |
|-----|-------|-----------|
| LMW | 14460 | 0.04262   |
| MMW | 3338  | 7.379e-08 |
| HMW | 39859 | 0.0001512 |

Table S16. Comparison between mean concentrations measured in cold and warm months in Manila clam, controlling for the effect of sampling year with ANCOVA.

|     | h        | p-value |
|-----|----------|---------|
| LMW | 0.72895  | 0.0409  |
| MMW | 0.745463 | 0       |
| HMW | 0.73026  | 0.2377  |

Table S17. Comparison between mean concentrations measured in cold and warm months in red mullet, using Wilcoxon rank sum test with continuity correction.

|     | W   | p-value |
|-----|-----|---------|
| LMW | 69  | 0.2488  |
| MMW | 34  | 0.7172  |
| HMW | 201 | 0.4702  |

Table S18. Comparison between mean concentrations measured in cold and warm months in red mullet, controlling for the effect of sampling year with ANCOVA.

|     | h        | p-value |
|-----|----------|---------|
| LMW | 0.623478 | 0.9996  |
| MMW | 0.654525 | 0.9783  |
| HMW | 1.16508  | 0.9969  |

Table S19. Pairwise correlation coefficients with p-values (among brackets) between latitude, sampling depth and sampling year and LMW PAHs concentrations in Mediterranean mussel caught along the Italian coast of the Adriatic Sea in warm months.

|               | Latitude                 | Depth                    | Concentration            | Sampling year            |
|---------------|--------------------------|--------------------------|--------------------------|--------------------------|
| Latitude      | 1                        | 0.2214401<br>(1.99E-08)  | -0.1067694<br>(6.81E-03) | -0.2075656<br>(1.43E-07) |
| Depth         | 0.2214401<br>(1.99E-08)  | 1                        | -0.1468864<br>(1.97E-04) | -0.1673262<br>(2.22E-05) |
| Concentration | -0.1067694<br>(6.81E-03) | -0.1468864<br>(1.97E-04) | 1                        | 0.2517786<br>(1.75E-10)  |
| Sampling year | -0.2075656<br>(1.43E-07) | -0.1673262<br>(2.22E-05) | 0.2517786<br>(1.75E-10)  | 1                        |

Table S20. Pairwise correlation coefficients with p-values (among brackets) between latitude, sampling depth and sampling year and LMW PAHs concentrations in Mediterranean mussel caught along the Italian coast of the Adriatic Sea in cold months.

|               | Latitude                  | Depth                   | Concentration            | Sampling year            |
|---------------|---------------------------|-------------------------|--------------------------|--------------------------|
| Latitude      | 1                         | 0.2099184<br>(2.87E-05) | 0.1953428<br>(9.89E-05)  | -0.053704<br>(2.84E-01)  |
| Depth         | 0.20991836<br>(2.87E-05)  | 1                       | -0.116066<br>(2.07E-02)  | 0.2860409<br>(1.19E-08)  |
| Concentration | 0.19534281<br>(9.89E-05)  | -0.116066<br>(2.07E-02) | 1                        | -0.1415952<br>(4.77E-03) |
| Sampling year | -0.05370396<br>(2.84E-01) | 0.2860409<br>(1.19E-08) | -0.1415952<br>(4.77E-03) | 1                        |

Table S21. Pairwise correlation coefficients with p-values (among brackets) between latitude, sampling depth and sampling year and MMW PAHs concentrations in Mediterranean mussel caught along the Italian coast of the Adriatic Sea in warm months.

|               | Latitude                 | Depth                    | Concentration             | Sampling year            |
|---------------|--------------------------|--------------------------|---------------------------|--------------------------|
| Latitude      | 1                        | 0.4098711<br>(3.81E-12)  | -0.12992433<br>(2.77E-02) | -0.3046016<br>(2.46E-07) |
| Depth         | 0.4098711<br>(3.81E-12)  | 1                        | -0.09531347<br>(1.06E-01) | 0.1020633<br>(8.38E-02)  |
| Concentration | -0.1299243<br>(2.77E-02) | -0.0953135<br>(1.06E-01) | 1                         | 0.3661233<br>(5.55E-10)  |
| Sampling year | -0.3046016<br>(2.46E-07) | 0.1020633<br>(8.38E-02)  | 0.36612335<br>(5.55E-10)  | 1                        |

Table S22. Pairwise correlation coefficients with p-values (among brackets) between latitude, sampling depth and sampling year and MMW PAHs concentrations in Mediterranean mussel caught along the Italian coast of the Adriatic Sea in cold months.

|               | Latitude                 | Depth                    | Concentration             | Sampling year            |
|---------------|--------------------------|--------------------------|---------------------------|--------------------------|
| Latitude      | 1                        | 0.2395307<br>(9.79E-05)  | 0.10764629<br>(8.00E-02)  | 0.0331474<br>(5.90E-01)  |
| Depth         | 0.23953068<br>(9.79E-05) | 1                        | -0.16939674<br>(5.87E-03) | 0.2114675<br>(5.83E-04)  |
| Concentration | 0.10764629<br>(8.00E-02) | -0.1693967<br>(5.87E-03) | 1                         | -0.0949106<br>(1.23E-01) |
| Sampling year | 0.03314738<br>(5.90E-01) | 0.2114675<br>(5.83E-04)  | -0.09491059<br>(1.23E-01) | 1                        |

Table S23. Pairwise correlation coefficients with p-values (among brackets) between latitude, sampling depth and sampling year and HMW PAHs concentrations in Mediterranean mussel caught along the Italian coast of the Adriatic Sea in warm months.

|               | Latitude                 | Depth                    | Concentration            | Sampling year            |
|---------------|--------------------------|--------------------------|--------------------------|--------------------------|
| Latitude      | 1                        | 0.1933501<br>(1.77E-09)  | -0.3103082<br>(4.55E-22) | -0.3611953<br>(2.55E-29) |
| Depth         | 0.1933501<br>(1.77E-09)  | 1                        | -0.3632558<br>(1.23E-29) | -0.002299<br>(9.43E-01)  |
| Concentration | -0.3103082<br>(4.55E-22) | -0.3632558<br>(1.23E-29) | 1                        | 0.1852465<br>(8.14E-09)  |
| Sampling year | -0.3611953<br>(2.55E-29) | -0.002299<br>(9.43E-01)  | 0.1852465<br>(8.14E-09)  | 1                        |

Table S24. Pairwise correlation coefficients with p-values (among brackets) between latitude, sampling depth and sampling year and HMW PAHs concentrations in Mediterranean mussel caught along the Italian coast of the Adriatic Sea in cold months.

|               | Latitude                 | Depth                    | Concentration            | Sampling year            |
|---------------|--------------------------|--------------------------|--------------------------|--------------------------|
| Latitude      | 1                        | 0.2734209<br>(1.05E-14)  | 0.1531073<br>(1.49E-05)  | 0.0376332<br>(2.87E-01)  |
| Depth         | 0.27342088<br>(1.05E-14) | 1                        | -0.1228886<br>(5.10E-04) | 0.3005424<br>(1.89E-17)  |
| Concentration | 0.1531073<br>(1.49E-05)  | -0.1228886<br>(5.10E-04) | 1                        | -0.2381534<br>(1.63E-11) |
| Sampling year | 0.03763318<br>(2.87E-01) | 0.3005424<br>(1.89E-17)  | -0.2381534<br>(1.89E-17) | 1                        |

Table S25. Pairwise correlation coefficients with p-values (among brackets) between latitude, sampling depth and sampling year and LMW PAHs concentrations in Mediterranean mussel caught in the Tyrrhenian Sea in warm months.

|               | Latitude                 | Depth                    | Concentration            | Sampling year           |
|---------------|--------------------------|--------------------------|--------------------------|-------------------------|
| Latitude      | 1                        | -0.0116240<br>(6.47E-01) | 0.1371445<br>(6.31E-08)  | 0.1379185<br>(5.32E-08) |
| Depth         | -0.0116240<br>(6.47E-01) | 1                        | -0.0714831<br>(4.81E-03) | 0.4558116<br>(2.82E-72) |
| Concentration | 0.1371445<br>(6.31E-08)  | -0.0714831<br>(4.81E-03) | 1                        | 0.3715108<br>(1.27E-48) |
| Sampling year | 0.1379185<br>(5.32E-08)  | 0.4558116<br>(2.82E-72)  | 0.3715108<br>(1.27E-48)  | 1                       |



Table S26. Pairwise correlation coefficients with p-values (among brackets) between latitude, sampling depth and sampling year and LMW PAHs concentrations in Mediterranean mussel caught in the Tyrrhenian Sea in cold months.

|               | Latitude                  | Depth                   | Concentration            | Sampling year            |
|---------------|---------------------------|-------------------------|--------------------------|--------------------------|
| Latitude      | 1                         | 0.1472713<br>(8.62E-04) | 0.16273394<br>(2.31E-04) | -0.0651628<br>(1.40E-01) |
| Depth         | 0.14727134<br>(8.62E-04)  | 1                       | 0.23318093<br>(1.32E-07) | 0.6546738<br>(1.21E-49)  |
| Concentration | 0.16273394<br>(2.31E-04)  | 0.2331809<br>(1.32E-07) | 1                        | 0.0800257<br>(7.02E-02)  |
| Sampling year | -0.06516283<br>(1.40E-01) | 0.6546738<br>(1.21E-49) | 0.08002572<br>(7.02E-02) | 1                        |

Table S27. Pairwise correlation coefficients with p-values (among brackets) between latitude, sampling depth and sampling year and MMW PAHs concentrations in Mediterranean mussel caught in the Tyrrhenian Sea in warm months.

|               | Latitude                  | Depth                    | Concentration             | Sampling year           |
|---------------|---------------------------|--------------------------|---------------------------|-------------------------|
| Latitude      | 1                         | -0.0296697<br>(4.52E-01) | 0.01640707<br>(6.78E-01)  | 0.2234357<br>(1.48E-08) |
| Depth         | -0.02966968<br>(4.52E-01) | 1                        | -0.10472471<br>(7.94E-03) | 0.4848167<br>(1.05E-34) |
| Concentration | 0.01640707<br>(6.78E-01)  | -0.1047247<br>(7.94E-03) | 1                         | 0.4008783<br>(2.97E-24) |
| Sampling year | 0.22343568<br>(1.48E-08)  | 0.4848167<br>(1.05E-34)  | 0.40087834<br>(2.97E-24)  | 1                       |

Table S28. Pairwise correlation coefficients with p-values (among brackets) between latitude, sampling depth and sampling year and MMW PAHs concentrations in Mediterranean mussel caught in the Tyrrhenian Sea in cold months.

|               | Latitude                 | Depth                    | Concentration             | Sampling year            |
|---------------|--------------------------|--------------------------|---------------------------|--------------------------|
| Latitude      | 1                        | 0.161335<br>(1.63E-02)   | 0.05308233<br>(4.29E-01)  | -0.0457437<br>(4.96E-01) |
| Depth         | 0.16133503<br>(1.63E-02) | 1                        | -0.05844194<br>(3.84E-01) | 0.5788286<br>(6.65E-18)  |
| Concentration | 0.05308233<br>(4.29E-01) | -0.0584419<br>(3.84E-01) | 1                         | 0.4838851<br>(5.73E-13)  |
| Sampling year | -0.0457437<br>(4.96E-01) | 0.5788286<br>(6.65E-18)  | 0.48388511<br>(5.73E-13)  | 1                        |

Table S29. Pairwise correlation coefficients with p-values (among brackets) between latitude, sampling depth and sampling year and HMW PAHs concentrations in Mediterranean mussel caught in the Tyrrhenian Sea in warm months.

|               | Latitude                  | Depth                    | Concentration            | Sampling year            |
|---------------|---------------------------|--------------------------|--------------------------|--------------------------|
| Latitude      | 1                         | -0.0867506<br>(3.25E-06) | 0.16533876<br>(7.23E-19) | 0.2181361<br>(1.21E-31)  |
| Depth         | -0.08675057<br>(3.25E-06) | 1                        | 0.02674539<br>(1.51E-01) | 0.4469051<br>(4.63E-127) |
| Concentration | 0.16533876<br>(7.23E-19)  | 0.0267454<br>(1.51E-01)  | 1                        | 0.3557125<br>(3.31E-81)  |
| Sampling year | 0.21813614<br>(1.21E-31)  | 0.4469051<br>(4.63E-127) | 0.35571249<br>(3.31E-81) | 1                        |

Table S30. Pairwise correlation coefficients with p-values (among brackets) between latitude, sampling depth and sampling year and HMW PAHs concentrations in Mediterranean mussel caught in the Tyrrhenian Sea in cold months.

|               | Latitude                 | Depth                   | Concentration            | Sampling year            |
|---------------|--------------------------|-------------------------|--------------------------|--------------------------|
| Latitude      | 1                        | 0.2924779<br>(5.40E-20) | 0.09727089<br>(2.33E-03) | -0.1382466<br>(1.51E-05) |
| Depth         | 0.29247791<br>(5.40E-20) | 1                       | 0.11188986<br>(4.61E-04) | 0.6133932<br>(3.60E-82)  |
| Concentration | 0.09727089<br>(2.33E-03) | 0.1118899<br>(4.61E-04) | 1                        | 0.2618919<br>(2.44E-16)  |
| Sampling year | -0.1382466<br>(1.51E-05) | 0.6133932<br>(3.60E-82) | 0.2618919<br>(2.44E-16)  | 1                        |

Figure S1. Geographical distributions of sampling sites of Mediterranean mussel caught along the Italian coast of the Adriatic Sea in warm months.

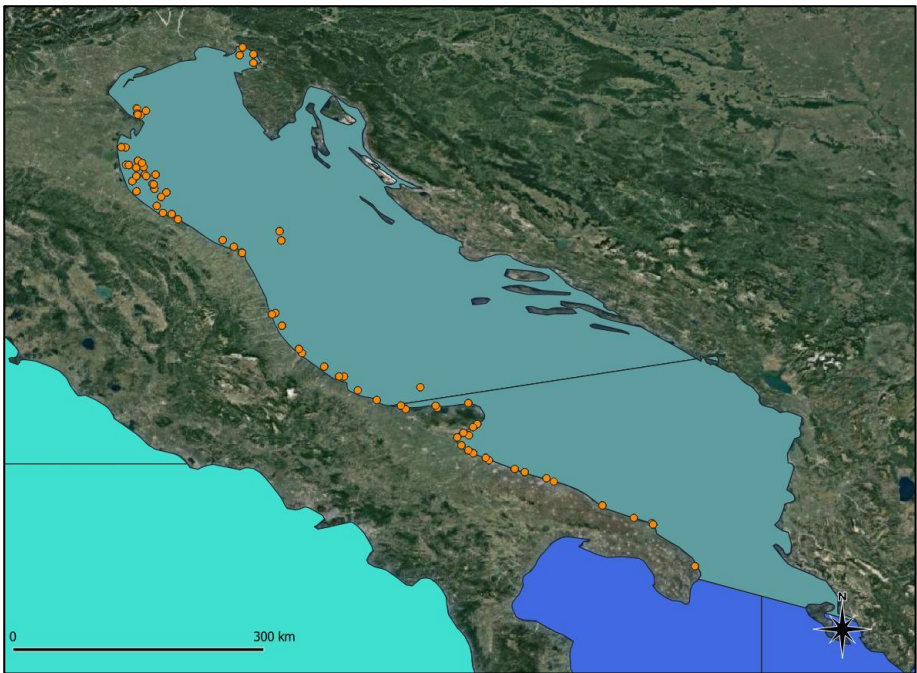

Figure S2. Geographical distributions of sampling sites of Mediterranean mussel caught along the Italian coast of the Adriatic Sea in cold months.

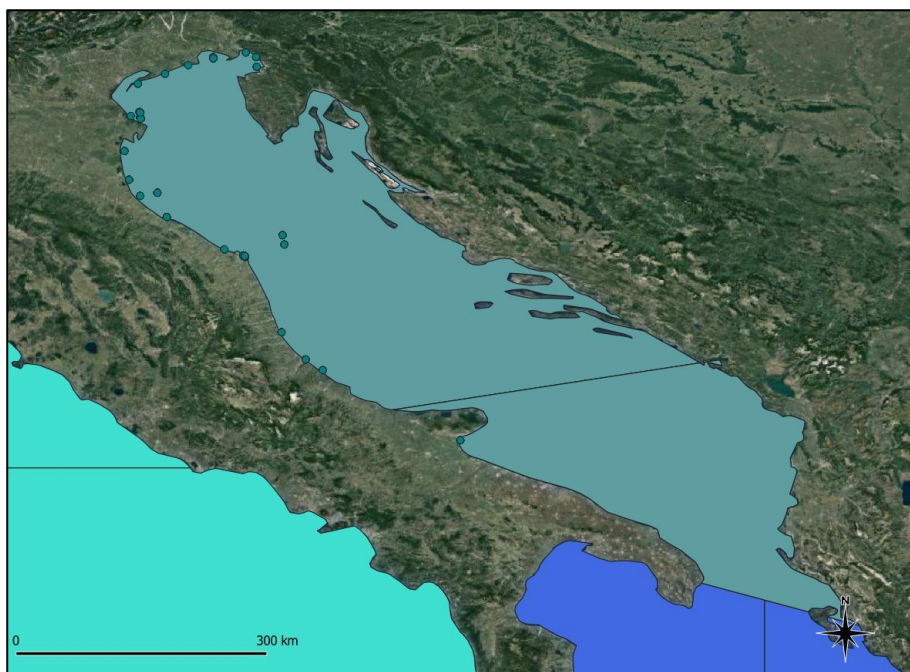

Figure S3. Geographical distributions of sampling sites of Mediterranean mussel caught in the Tyrrhenian Sea in warm months.

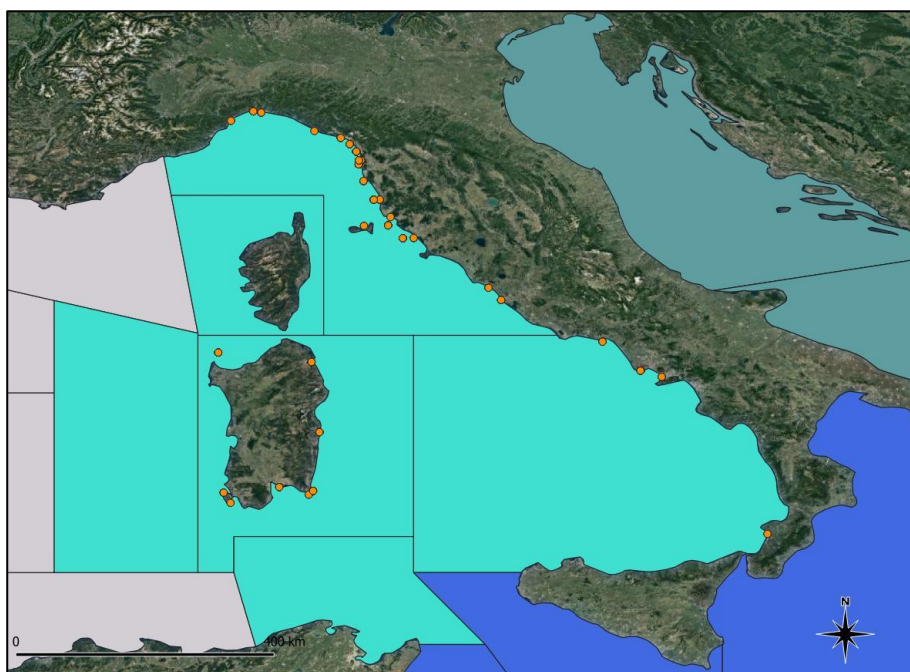

Figure S4. Geographical distributions of sampling sites of Mediterranean mussel caught in the Tyrrhenian Sea in cold months.

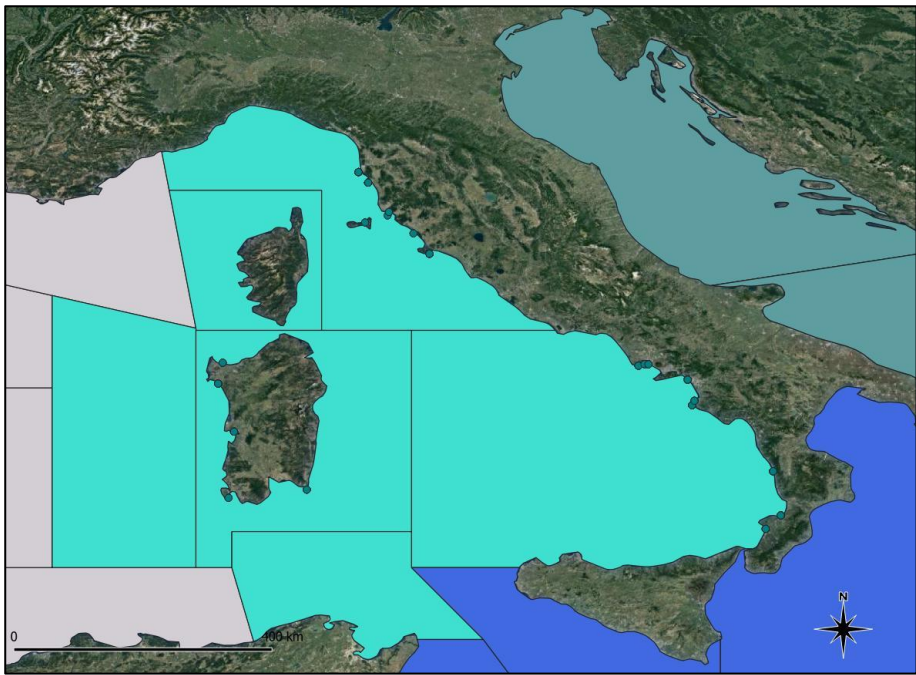

Figure S5. Boxplots of the concentration of single PAHs in Mediterranean mussel. The color of the boxes indicates the molecular weight of the given PAH. Boxplots are arranged in ascending order by median.

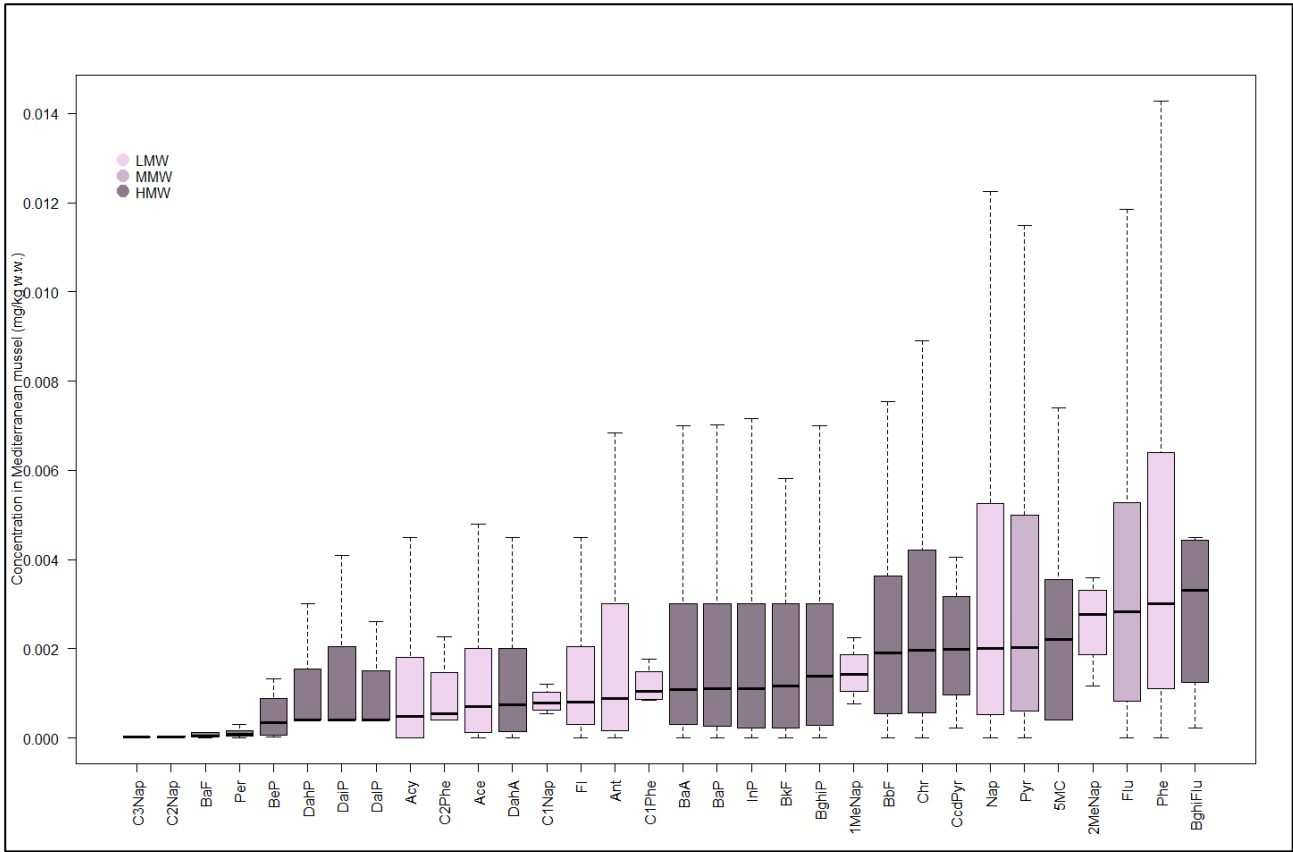

Figure S6: Boxplots of the concentration of single PAHs in Manila clam. The color of the boxes indicates the molecular weight of the given PAH. Boxplots are arranged in ascending order by median.

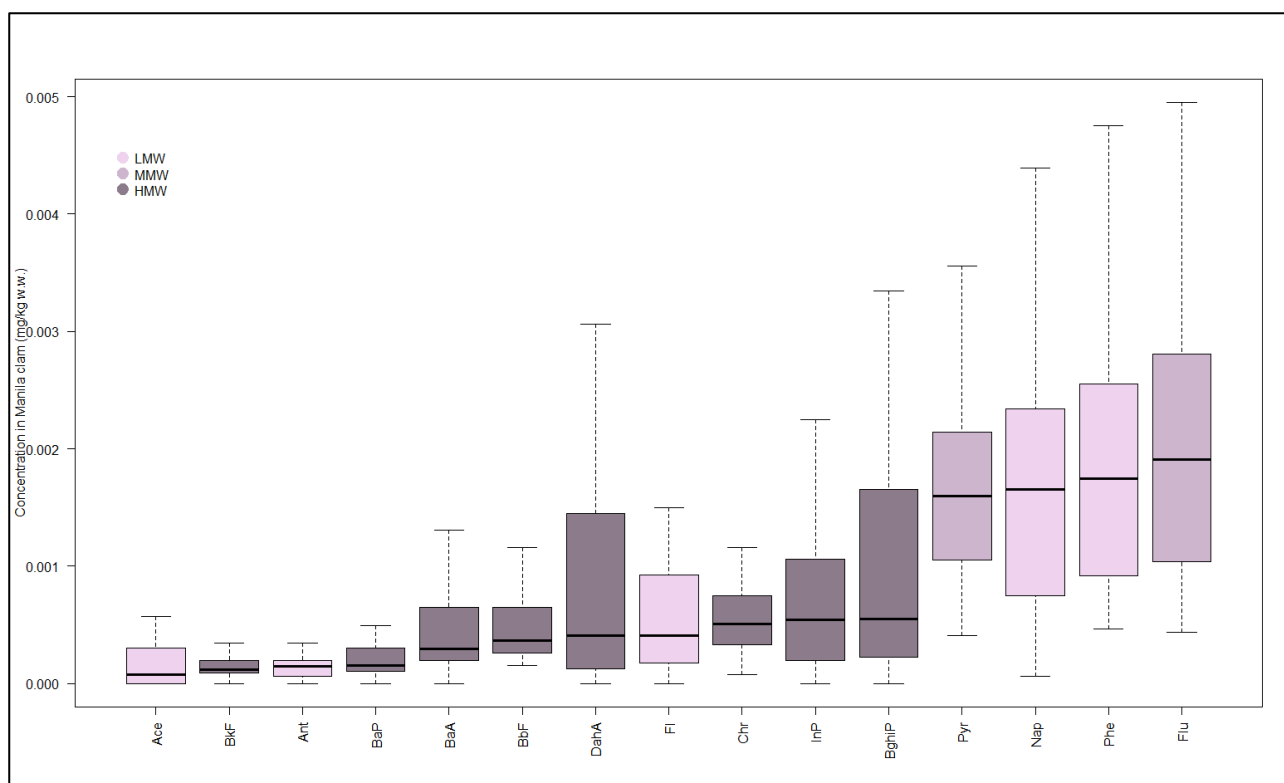

#### References:

1. Cinnirella, S.; Bruno, D.E.; Pirrone, N.; Horvat, M.; Živković, I.; Evers, D.C.; Johnson, S.; Sunderland, E.M. Mercury Concentrations in Biota in the Mediterranean Sea, a Compilation of 40 Years of Surveys. *Sci. Data* **2019**, *6*, 205, doi:10.1038/s41597-019-0219-y.
2. Ferrante, M.; Zanghi, G.; Cristaldi, A.; Copat, C.; Grasso, A.; Fiore, M.; Signorelli, S.S.; Zuccarello, P.; Oliveri Conti, G. PAHs in Seafood from the Mediterranean Sea: An Exposure Risk Assessment. *Food Chem. Toxicol.* **2018**, *115*, 385–390, doi:10.1016/j.fct.2018.03.024.
3. US-EPA Guidance for Assessing Chemical Contamination Data for Use in Fish Advisories, Vol. II. Risk Assessment and Fish Consumption Limits EPA/823-B94-004 2000.
